# Supplementary material for: Constructing a robust gigantic drum-like hydrophobic [Co24U6] nanocage in a metal–organic framework for high-performance SO2 removal in humid conditions
Source: Royal Society of Chemistry journal article supplement (doi:10.1039/d0ta10004h), 2021-01-01
Supplement: d0ta10004h1.pdf [file d0ta10004h1.pdf]

**Constructing robust gigantic drum-like hydrophobic [Co<sub>24</sub>U<sub>6</sub>] nanocage in metal-organic framework for high-performance SO<sub>2</sub> removal at humidity condition**

Yaling Fan,<sup>a</sup> Mengjia Yin,<sup>a</sup> Rajamani Krishna,<sup>b</sup> Xuefeng Feng,<sup>a</sup> and Feng Luo<sup>a\*</sup>

<sup>a</sup>School of Chemistry, Biology and Materials Science, East China University of Technology, Nanchang 330013, P.R.China

\*Corresponding Author(s): Feng Luo: [ecitluofeng@163.com](mailto:ecitluofeng@163.com)

<sup>b</sup>Van't Hoff Institute for Molecular Sciences, University of Amsterdam, Science Park 904, 1098 XH Amsterdam, The Netherlands

**X-ray Crystallography.** X-ray diffraction data of Cage-U-Co-MOF were collected at room temperature on a Bruker Apex II CCD diffractometer using graphite monochromated MoK $\alpha$  radiation ( $\lambda=0.71073$  Å). The data reduction included a correction for Lorentz and polarization effects, with an applied multi-scan absorption correction (SADABS). The crystal structure was solved and refined using the SHELXTL program suite. Direct methods yielded all non-hydrogen atoms, which were refined with anisotropic thermal parameters. All hydrogen atom positions were calculated geometrically and were riding on their respective atoms. The SQUEEZE subroutine of the PLATON software<sup>15</sup> suite was used to remove the scattering from the highly disordered guest molecules. CCDC 2032794 contains the supplementary crystallographic data of Cage-U-Co-MOF. These data can be obtained free of charge from the Cambridge Crystallographic Data Centre via [www.ccdc.cam.ac.uk/data\\_request/cif](http://www.ccdc.cam.ac.uk/data_request/cif).

### **Fitting of experimental data on pure component isotherms**

The isotherm data for SO<sub>2</sub> and CO<sub>2</sub> in Cage-U-Co-MOF at 298 K were fitted with the dual-site Langmuir model, where we distinguish two distinct adsorption sites A and B:

$$q = \frac{q_{sat,A} b_A p}{1 + b_A p} + \frac{q_{sat,B} b_B p}{1 + b_B p}$$

The unary isotherm fit parameters are provided in Table S2.

The isotherm data for N<sub>2</sub> in Cage-U-Co-MOF at 298 K was fitted with the 1-site Langmuir model

$$q = q_{sat} \frac{bp}{1 + bp}$$

The 1-site Langmuir fit parameters are provided in Table S3.

### **Isosteric heat of adsorption**

The binding energy is reflected in the isosteric heat of adsorption,  $Q_{st}$ , is calculated from the Clausius-Clapeyron equation

$$Q_{st} = -RT^2 \left( \frac{\partial \ln p}{\partial T} \right)_q$$

For the 1-site Langmuir-Freundlich model the differentiation of the Clausius-Clapeyron equation can be carried out analytically.

### **IAST calculations of adsorption selectivities and uptake capacities**

We consider the separation of binary mixtures at 298 K. The adsorption selectivity for SO<sub>2</sub>/CO<sub>2</sub>, SO<sub>2</sub>/N<sub>2</sub> separation is defined by

$$S_{ads} = \frac{q_1/q_2}{p_1/p_2}$$

### **Transient breakthrough simulations**

The performance of industrial fixed bed adsorbers is dictated by a combination of adsorption selectivity and uptake capacity. Transient breakthrough simulations were carried out using the methodology described in earlier publications (*Microporous Mesoporous Mater.* **2014**, *185*, 30-50; *Sep. Purif. Technol.* **2018**, *194*, 281-300; *ACS Omega* **2020**, *5*, 16987–17004). The following two mixtures were investigated.

1/99 SO<sub>2</sub>/CO<sub>2</sub> mixtures at 298 K,

1/99 SO<sub>2</sub>/N<sub>2</sub> mixtures at 298 K,

For the breakthrough simulations, the following parameter values were used: length of packed bed,  $L = 0.3$  m; voidage of packed bed,  $\varepsilon = 0.4$ ; superficial gas velocity at inlet,  $u = 0.04$  m/s.

The  $y$ -axis is the dimensionless concentrations of each component at the exit of the fixed bed,  $c_i/c_{i0}$  normalized with respect to the inlet feed concentrations. The  $x$ -axis is the *dimensionless* time,

$$\tau = \frac{tu}{L\varepsilon}, \text{ defined by dividing the actual time, } t, \text{ by the characteristic time, } \frac{L\varepsilon}{u}.$$

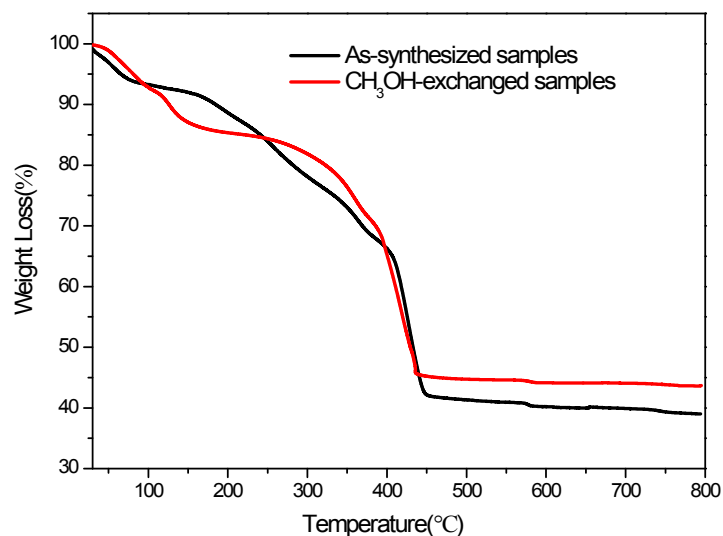

**Fig. S1** The TG plot of **Cage-U-Co-MOF** and the CH<sub>3</sub>OH-exchanged samples.

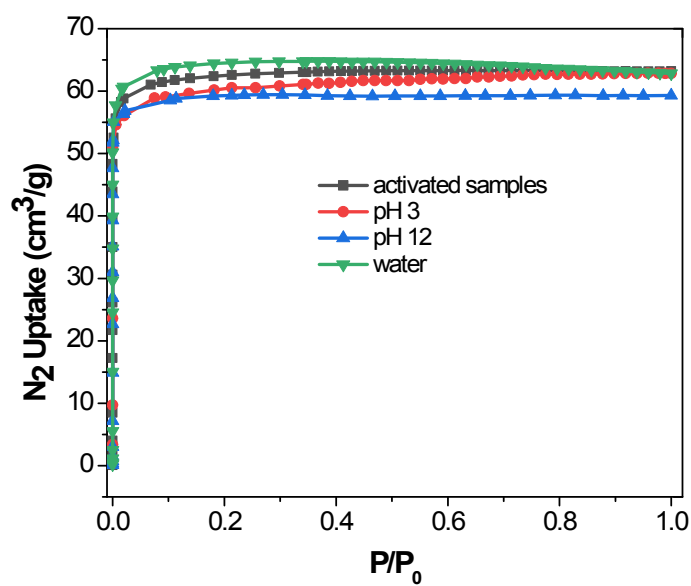

**Fig. S2** A comparison of Ar adsorption at 77 K for the activated samples and the samples after immersing in water and pH=3 and 12 solution. The corresponding BET surface area is 208 m<sup>2</sup>/g, 212m<sup>2</sup>/g, 201 m<sup>2</sup>/g, and 199 m<sup>2</sup>/g, respectively.

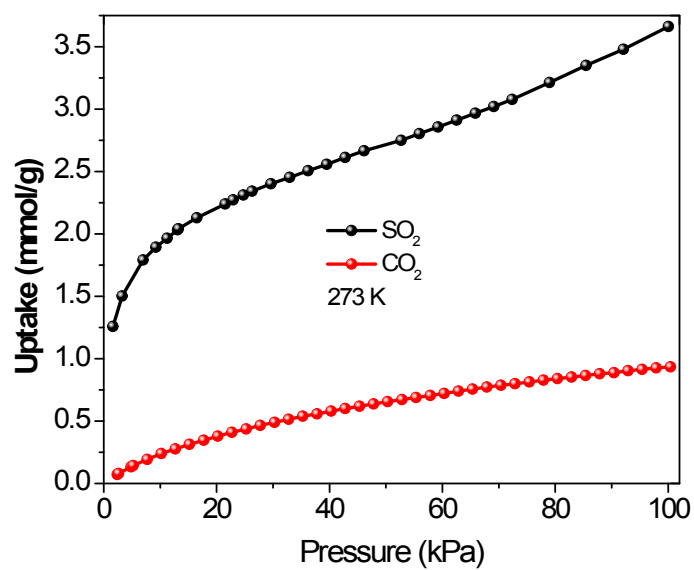

Fig. S3 The SO<sub>2</sub> and CO<sub>2</sub> adsorption at 273 K.

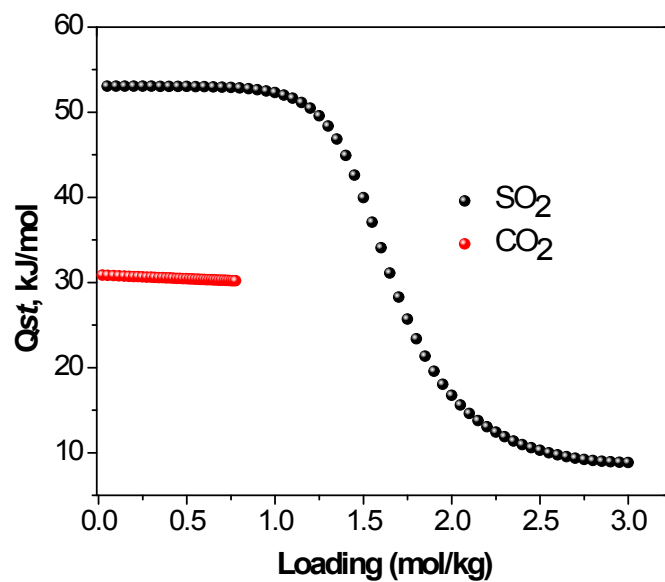

Fig. S4 The Q<sub>st</sub> value of SO<sub>2</sub> and CO<sub>2</sub> for Cage-U-Co-MOF.

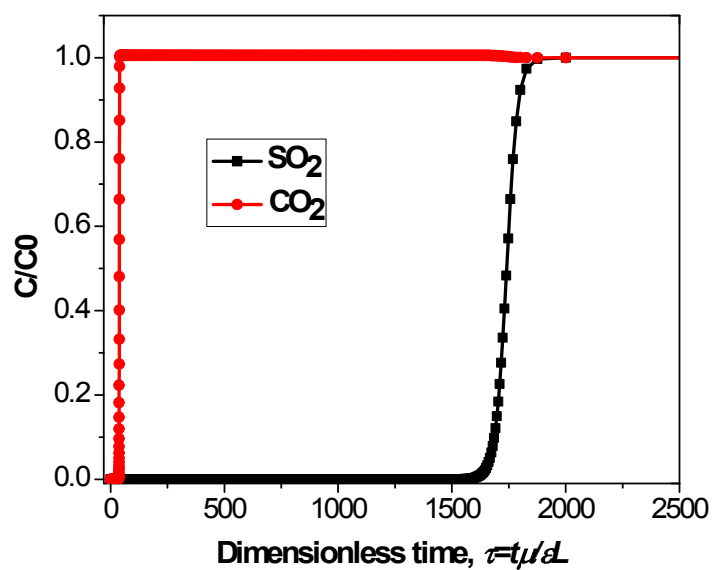

**Fig. S5** The transient breakthrough simulations for a 1:99 v/v  $\text{SO}_2/\text{CO}_2$  mixture based on **Cage-U-Co-MOF** bed.

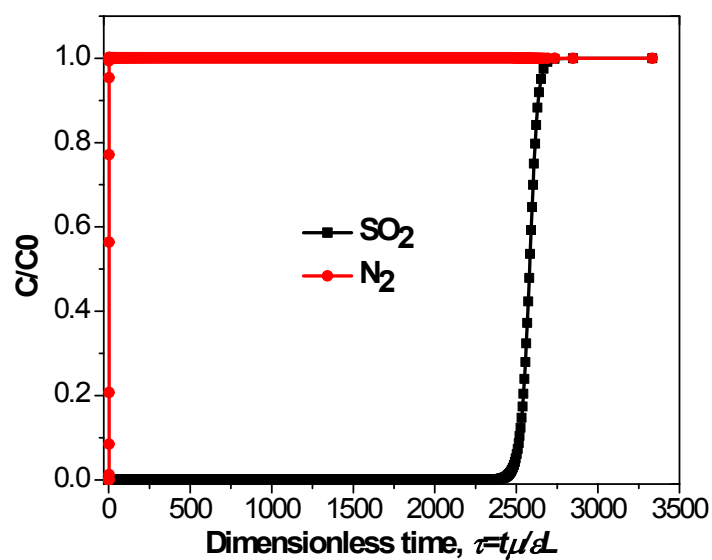

**Fig. S6** The transient breakthrough simulations for a 1:99 v/v  $\text{SO}_2/\text{N}_2$  mixture based on **Cage-U-Co-MOF** bed.

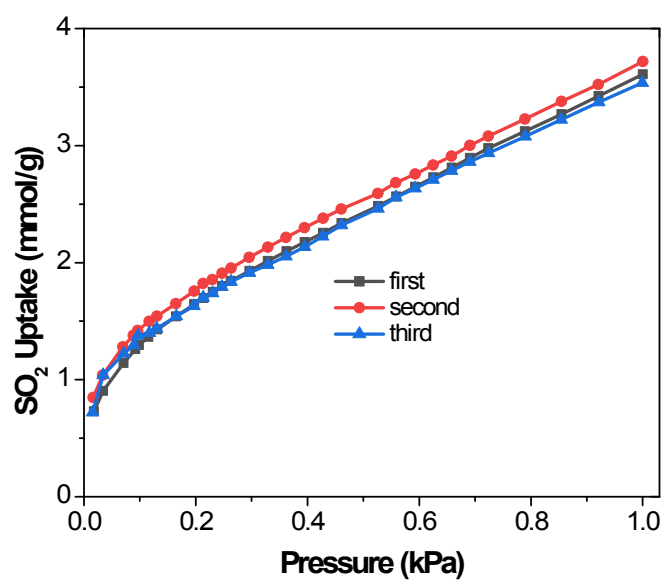

Fig. S7 Repeating SO<sub>2</sub> adsorption test for Cage-U-Co-MOF.

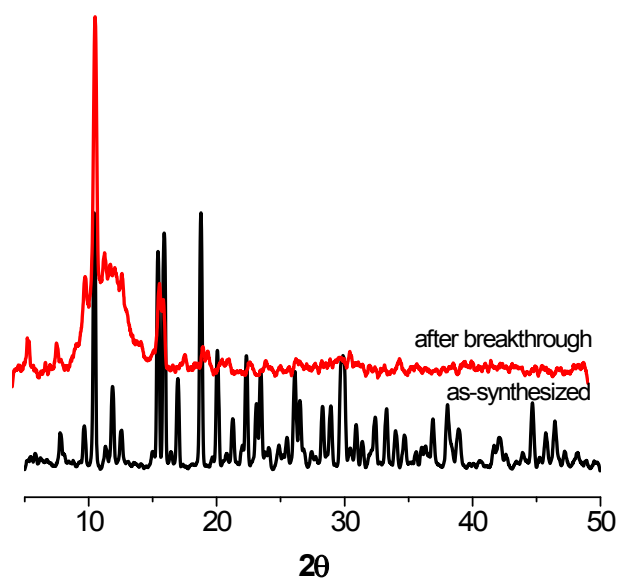

Fig. S8 A comparison of PXRD patterns of the as-synthesized samples and the samples after all breakthrough experiments.

**Table S1.** A comparison of reported MOFs for SO<sub>2</sub> removal.

| MOF types                   | SO <sub>2</sub> adsorption capacity<br>(1 bar, 298 K), mmol/g | SO <sub>2</sub> /CO <sub>2</sub><br>selectivity | References |
|-----------------------------|---------------------------------------------------------------|-------------------------------------------------|------------|
| SIFSIX-2-Cu-i               | 11.0                                                          | 87.1                                            | 1          |
| Ni(bdc)(ted) <sub>0.5</sub> | 9.97                                                          | -                                               | 2          |
| MFM-300(In)                 | 8.28                                                          | 50                                              | 3          |
| MFM-202a                    | 10.2                                                          | -                                               | 4          |
| NOTT-300 (Al)               | 7.1                                                           | -                                               | 5          |
| MFM-170                     | 17.5                                                          | 28                                              | 6          |
| MOF-5                       | Less than 0.016                                               | -                                               | 7          |
| IRMOF-3                     | 0.094                                                         | -                                               | 7          |
| MOF-74                      | 3.03                                                          | -                                               | 7          |
| MOF-199                     | 0.5                                                           | -                                               | 7          |
| P(TMGA-co-MBA)              | 4.0                                                           | -                                               | 8          |
| Activated Carbon            | 3.3                                                           | -                                               | 9          |
| <b>Cage-U-Co-MOF</b>        | 3.62                                                          | 80.7                                            | Our work   |

“-” denotes the data can not be obtained from corresponding reference.

1. Cui. X. L.; Yang. Q. W.; Yang. L. F.; Krishna. R.; Zhang. Z. G.; Bao. Z. B.; Wu. H.; Ren. Q.; Zhou. W.; Chen. B. L.; Xing. H. B. Ultrahigh and selective SO<sub>2</sub> uptake in inorganic anion-pillared hybrid porous materials. *Advanced Materials*. **2017**. 29.1606929(1-9).

2. Tan. K.; Canepa. P.; Gong. Q. H.; Liu. J.; Johnson. D. H.; Dyevoich. A.; Thallapally. P. K.; Thonhauser. T.; Li. J.; Chabal. Y. J. Mechanism of preferential adsorption of SO<sub>2</sub> into two microporous paddle wheel frameworks M(bdc)(ted)<sub>0.5</sub>. *Chemistry of Materials*. **2013**. 25. 4653-4662.

3. Savage. M.; Cheng .Y. Q.; Easun. T. L.; Eyley. J. E.; Argent.S. P.; Warren. M. R.; Lewis. W.; Murray. C.; Tang. C. C.; Frogley. M. D.; Cinque G.; Sun. J. L.; Rudic'. S.; Murden R. T.; Benham. M. J.; Fitch. A. N.; Blake. A. J.; Ramirez-Cuesta. A. J.; Yang. S. H.; Schroder. M. Selective Adsorption of Sulfur Dioxide in a Robust Metal–Organic Framework Material. *Advanced Materials*.



2016. 28. 8705-8711.

4. Yang. S. H.; Liu. L. F.; Sun. J. L.; Thomas. K. M.; Davies A. J.; George. M. W.; Blake. A. J.; Hill. A. H.; Fitch. A. N.; Tang. C. C. , Chroeder. M. Irreversible network transformation in a dynamic porous host catalyzed by sulfur dioxide. *Journal of the American Chemical Society*. **2013**. 135. 4954-4957.

5. Yang. S. H.; Sun. J. L.; Ramirez-Cuesta. A. J.; Callear. S. K.; David. W. F.; Anderson. D. P.; Newby. R.; Blake1. A. J.; Parker. J. E.; Tang. C. C.; Schroöder1. M. Selectivity and direct visualization of carbon dioxide and sulfur dioxide in a decorated porous host. *Nature chemistry*. **2012**. 4.887-894.

6. Smith. G. L.; Eyley. J. E.; Han. X.; Zhang. X. R.; Li. J. N.; Jacques. N. M.; Godfrey. H. G. W.; Argent. S. P.; McPherson. L. J. M.; Teat. S. J.; Cheng Y. Q.; Frogley. M. D.; Cinque. G.; Day S. J.; C. C. Tang.; Easun . T. L.; Rudić. S.; Ramirez-Cuesta . A. J.; Yang. S.H.; Schroöder1. M. Reversible coordinative binding and separation of sulfur dioxide in a robust metal–organic framework with open copper sites. *Nature Materials*. **2019**. 18. 1358-1365.

7. Britt. D.; Tranchemontagne. D.; Yaghi O. M. Metal-organic frameworks with high capacity and selectivity for harmful gases. *Proceedings of the National Academy of Sciences of the United States of America*. **2008**. 105. 11623-11627.

8. Wu. L. B.; An. D.; Dong. J.; Zhang. Z. M.; Li. B. G.; Zhu. S. P. Preparation and SO<sub>2</sub> Absorption/Desorption Properties of Crosslinked Poly(1,1,3,3-Tetramethylguanidine Acrylate) Porous Particles. *Macromolecular Rapid Communications*. **2006**. 37.1949-1954.

9. Yi. H. H.; Wang. Z. X.; Liu. H.Y.; Tang X. L.; Ma. D.; Zhao. S. Z.; Zhang. B. W.; Gao. F. Y.; Zuo Y. R. Adsorption of SO<sub>2</sub>, NO, and CO<sub>2</sub> on Activated Carbons: Equilibrium and Thermodynamics . *Journal of Chemical & Engineering Data*. **2014**. 59. 1556-1563.

**Table S2.** Dual-site Langmuir parameter fits for SO<sub>2</sub> and CO<sub>2</sub> in Cage-U-Co-MOF at 298 K.

|                 | Site A                              |                           | Site B                              |                           |
|-----------------|-------------------------------------|---------------------------|-------------------------------------|---------------------------|
|                 | $q_{A,sat}$<br>mol kg <sup>-1</sup> | $b_A$<br>Pa <sup>-1</sup> | $q_{B,sat}$<br>mol kg <sup>-1</sup> | $b_B$<br>Pa <sup>-1</sup> |
| SO <sub>2</sub> | 11                                  | 2.875E-06                 | 1.1                                 | 8.548E-04                 |

|                 |     |           |   |           |
|-----------------|-----|-----------|---|-----------|
| CO <sub>2</sub> | 0.2 | 5.562E-06 | 2 | 5.441E-06 |
|-----------------|-----|-----------|---|-----------|

**Table S3.** 1-site Langmuir parameter fits for N<sub>2</sub> in Cage-U-Co-MOF at 298 K.

|                | $q_{\text{sat}}$<br>mol kg <sup>-1</sup> | $b$<br>Pa <sup>-1</sup> |
|----------------|------------------------------------------|-------------------------|
| N <sub>2</sub> | 0.15                                     | 3.21095E-06             |
